# Supplementary material
Source: publisher figshare collection journal article supplement (https://acs.figshare.com/ndownloader/files/4283559)
Supplement: Supplementary file 1 [file 4283559]

# The Thioether-Methyleneborane (PhSCH<sub>2</sub>B(C<sub>6</sub>F<sub>5</sub>)<sub>2</sub>)<sub>2</sub>: Synthesis and Reactivity with Donors and Alkynes

*Cheryl A. Tanur and Douglas W. Stephan\**

## Thermodynamic Calculations for **1**

From the VT NMR of compound **1**, one can calculate the change in enthalpy ( $\Delta H$ ), change in entropy ( $\Delta S$ ), and change in Gibbs free energy ( $\Delta G$ ) of the system. By measuring the integral of the peak corresponding to the CH<sub>2</sub> protons of the dimer of **1** that exists at -60°C and compare that to the new CH<sub>2</sub> peak that grows in as temperatures increase to 55°C, one can obtain a ratio and calculate the equilibrium constant  $K_{eq}$ . At room temperature the <sup>1</sup>H resonances were referenced internally to the residual protonated solvent resonance ( $\delta$  2.09 for *d*<sub>8</sub>-toluene) and at every other temperature the <sup>1</sup>H resonances were referenced externally to the aryl protons of trimethoxyborane ( $\delta$  6.14). A Van't Hoff plot was then constructed by plotting the natural logarithm of  $K_{eq}$  against the inversion of the temperature (Figure S.2). The data used to construct the Van't Hoff plot are tabulated in Table S.1. A stacked plot of the methylene resonances is shown in Figure S.1.

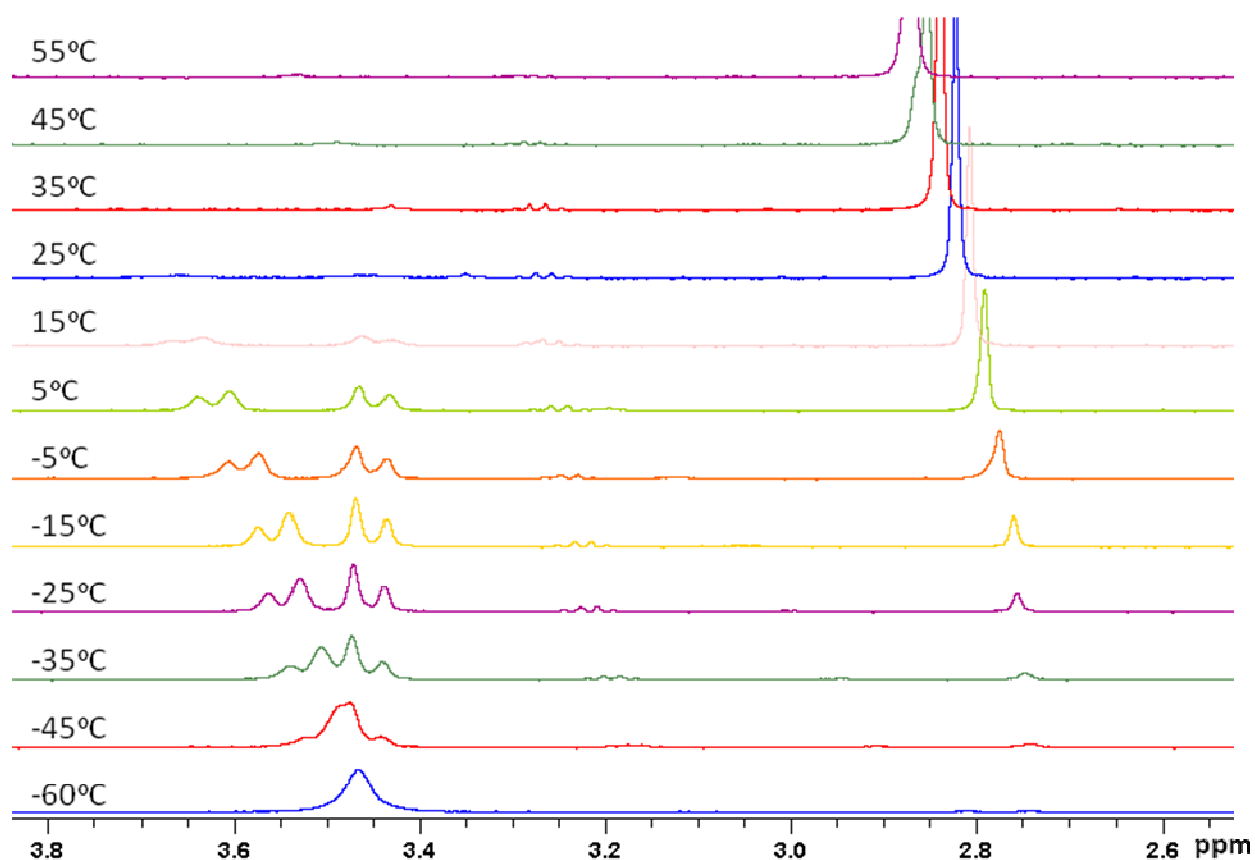

**Figure S.1** VT of  $^1\text{H}$  NMR tracking the methylene shift of **1**

**Table S.1** Data used in Van't Hoff plot for  $\text{PhSCH}_2\text{B}(\text{C}_6\text{F}_5)_2$

| T (°C) | T (K) | 1/T (K <sup>-1</sup> ) | ∫ monomer | ∫ dimer | $K_{\text{eq}} = \frac{\int \text{monomer}}{\int \text{dimer}}$ | ln( $K_{\text{eq}}$ ) |
|--------|-------|------------------------|-----------|---------|-----------------------------------------------------------------|-----------------------|
| 15     | 288   | 0.00347                | 1756.29   | 1157.66 | 1.517                                                           | 0.417                 |
| 5      | 278   | 0.00360                | 1155.72   | 1542.29 | 0.749                                                           | -0.289                |
| -5     | 268   | 0.00373                | 806.69    | 3118.70 | 0.259                                                           | -1.352                |
| -15    | 258   | 0.00388                | 431.39    | 2118.89 | 0.204                                                           | -1.592                |
| -25    | 248   | 0.00403                | 267.36    | 2523.94 | 0.106                                                           | -2.245                |
| -35    | 238   | 0.00420                | 187.43    | 2747.12 | 0.068                                                           | -2.685                |

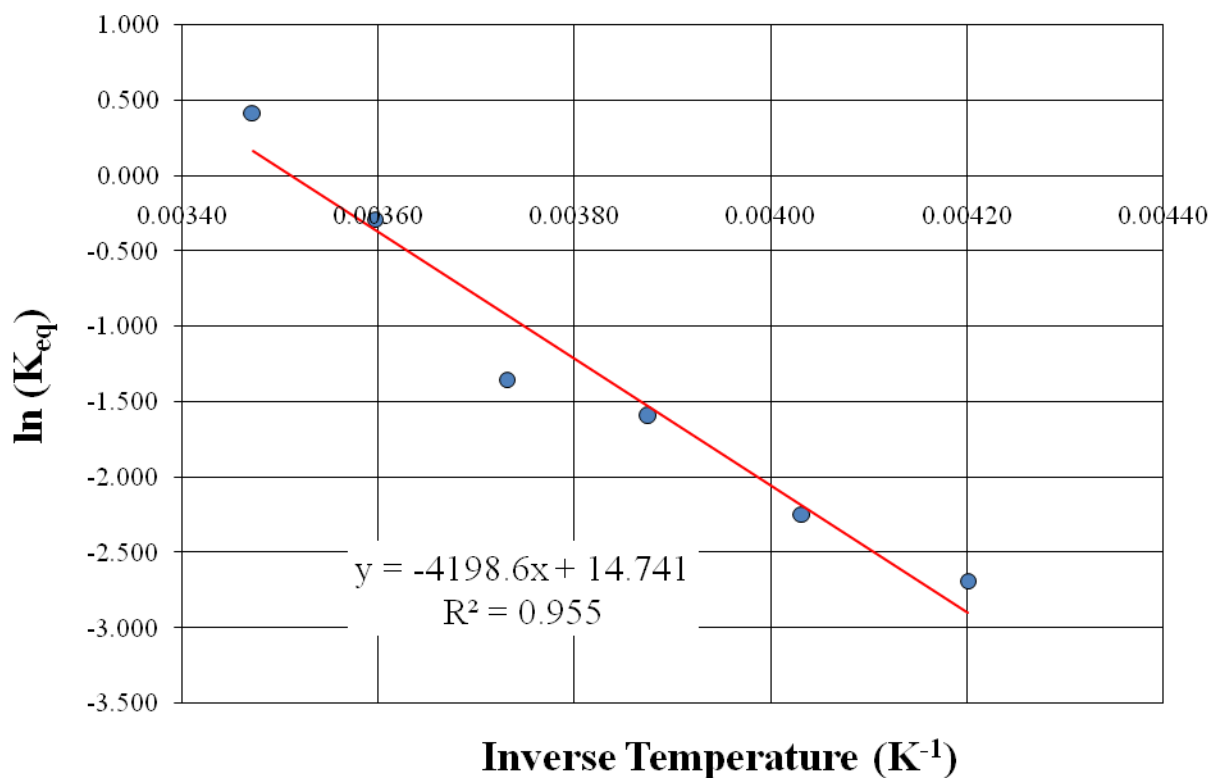

**Figure S.2** Van't Hoff plot showing the relationship between the dimer and monomer of compound **1**

$$\Delta G = \Delta H - T\Delta S = -RT\ln(K_{eq})$$

$$\ln(K_{eq}) = -\Delta H/(RT) + \Delta S/R$$

$$\Delta H^\circ = -mR = -(-4198.6 \text{ K})(8.314 \text{ J}/(\text{mol}\cdot\text{K})) = 34.9 \text{ kJ/mol}$$

$$\Delta S^\circ = bR = (14.741)(8.314 \text{ J}/(\text{mol}\cdot\text{K})) = 122.6 \text{ J}/(\text{mol}\cdot\text{K})$$

$$\Delta G^\circ = \Delta H^\circ - T\Delta S^\circ = (34.9 \text{ kJ/mol}) - (298.15 \text{ K})(122.6 \text{ J}/(\text{mol}\cdot\text{K})) = -1.63 \text{ kJ/mol}$$

$$K_{eq} = e^{-\Delta G^\circ/RT} = e^{-(-1.63 \text{ kJ/mol})/(8.314 \text{ J}/(\text{mol}\cdot\text{K}) \times 298.15 \text{ K})} = 1.93$$

## Thermodynamics of $\text{B}(\text{C}_6\text{F}_5)_3 \cdot \text{SMe}_2$

VT NMR was performed in order to determine the change in enthalpy ( $\Delta H$ ), change in entropy ( $\Delta S$ ), and change in Gibbs free energy ( $\Delta G$ ) of the system described in Scheme S.1. At room temperature the  $^1\text{H}$  resonances were referenced internally to the residual protonated solvent resonance ( $\delta$  6.94 for  $\text{C}_6\text{D}_5\text{Br}$ ) and at every other temperature the  $^1\text{H}$  resonances were referenced externally to the methyl protons of trimethoxyborane ( $\delta$  3.51). The adduct  $\text{B}(\text{C}_6\text{F}_5)_3 \cdot \text{SMe}_2$  and free  $\text{B}(\text{C}_6\text{F}_5)_3$  and  $\text{SMe}_2$  were monitored by the two peaks in the  $^1\text{H}$  NMR corresponding to the methyl protons. At room temperature there is only one peak occurring at  $\delta$  1.60 for the dimethylsulfide adduct ( $\delta_{\text{adduct}}$ ). At  $140^\circ\text{C}$  there is no more adduct and there is only free  $\text{B}(\text{C}_6\text{F}_5)_3$  and  $\text{SMe}_2$  species in which the methyl protons occur at  $\delta$  1.84 ( $\delta_{\text{free}}$ ). At temperatures between  $25$ – $140^\circ\text{C}$ , this peak shift ( $\delta_{\text{peak}}$ ) was monitored, as displayed in Figure S.3.

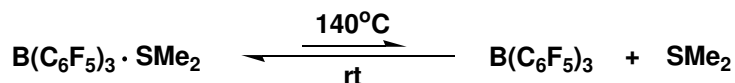

**Scheme S.1** Relationship studied of the adduct  $\text{B}(\text{C}_6\text{F}_5)_3 \cdot \text{SMe}_2$  and free  $\text{B}(\text{C}_6\text{F}_5)_3$  and  $\text{SMe}_2$

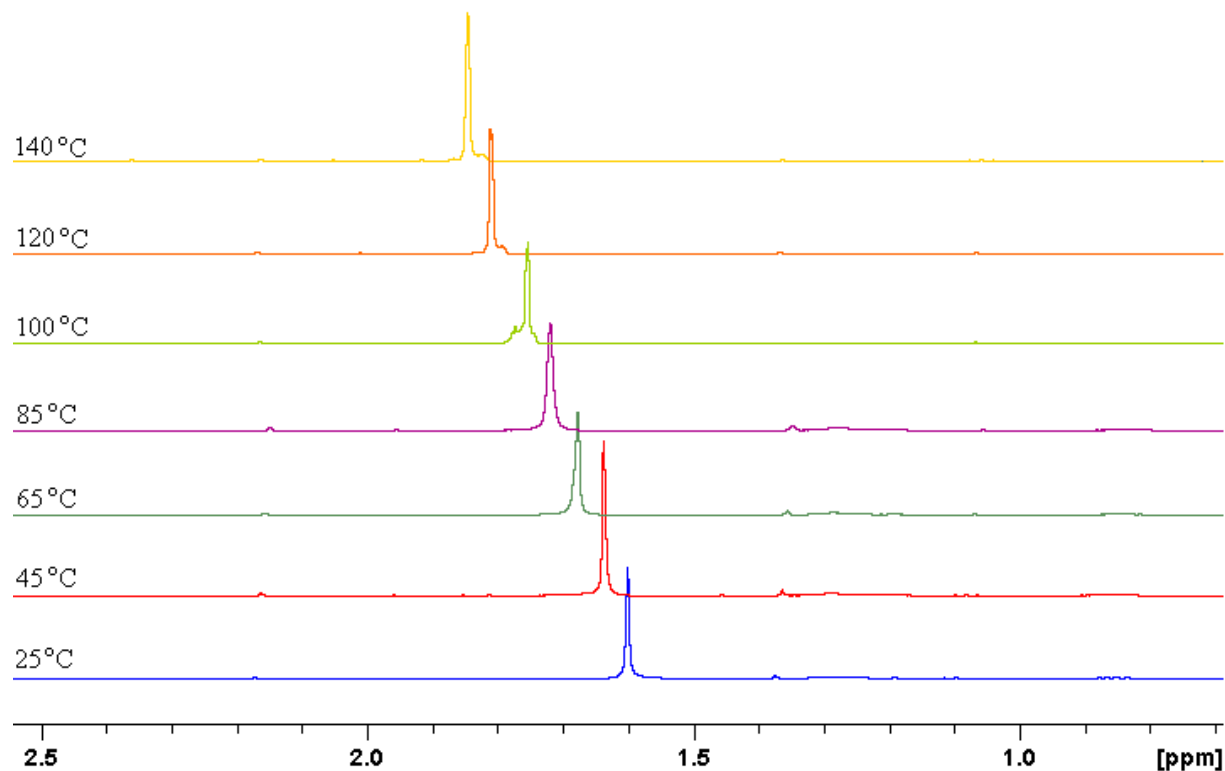

**Figure S.3** VT of  $^1\text{H}$  NMR tracking the methyl shift from adduct to free dimethylsulfide

Using these chemical shifts, the ratio of adduct converted to free species can be calculated by the expression:

$$\text{Ratio converted} = |\delta_{\text{peak}} - \delta_{\text{adduct}}| / |\delta_{\text{adduct}} - \delta_{\text{free}}|$$

From this ratio, the concentrations of the adduct  $[\text{B}(\text{C}_6\text{F}_5)_3 \cdot \text{SMe}_2]$ , and free species  $[\text{B}(\text{C}_6\text{F}_5)_3]$ ,  $[\text{SMe}_2]$ , can be calculated by knowing the initial concentration of  $[\text{B}(\text{C}_6\text{F}_5)_3 \cdot \text{SMe}_2]_i$  from the beginning.

The initial concentration of  $[\text{B}(\text{C}_6\text{F}_5)_3 \cdot \text{SMe}_2]_i$  is calculated from the initial number of moles of adduct  $N_{\text{B}(\text{C}_6\text{F}_5)_3 \cdot \text{SMe}_2}$  and the volume of the sample  $V$ . The number of moles of adduct can be calculated from the number of moles of trimethoxyborane, TMB, ( $N_{\text{TMB}}$ ), the integration of the methoxy protons of TMB ( $J_{\text{TMB}}$ ), the integration of the methyl protons of  $\text{B}(\text{C}_6\text{F}_5)_3 \cdot \text{SMe}_2$

( $\int_{\text{B(C}_6\text{F}_5)_3\cdot\text{SMe}_2}$ ) and the number of protons associated with each integration (at 25°C). The expression is shown below:

$$N_{\text{B(C}_6\text{F}_5)_3\cdot\text{SMe}_2} = N_{\text{TMB}} \times (9\text{H}/\int_{\text{TMB}}) \times (\int_{\text{B(C}_6\text{F}_5)_3\cdot\text{SMe}_2}/6\text{H})$$

There were 6 mg of TMB added to the sample ( $m_{\text{TMB}}$ ) and thus  $N_{\text{B(C}_6\text{F}_5)_3\cdot\text{SMe}_2}$  can be determined:

$$N_{\text{TMB}} = m_{\text{TMB}}/M_{\text{TMB}} = (6.0 \times 10^{-3} \text{ g})/(168.19 \text{ g/mol}) = 3.57 \times 10^{-5} \text{ mol}$$

$$N_{\text{B(C}_6\text{F}_5)_3\cdot\text{SMe}_2} = 3.57 \times 10^{-5} \text{ mol} \times (9\text{H}/10000) \times (1546.5/6\text{H}) = 8.28 \times 10^{-6} \text{ mol}$$

The volume of the sample can be calculated by the following formula:<sup>1</sup>

$$\begin{aligned} V &= (0.1435 \times \text{solution height}) - 0.0249 = (0.1435 \times 6.8 \text{ mL}) - 0.0249 = 0.951 \text{ mL} \\ &= 9.51 \times 10^{-3} \text{ L} \end{aligned}$$

The initial concentration  $[\text{B(C}_6\text{F}_5)_3\cdot\text{SMe}_2]_i$  is:

$$[\text{B(C}_6\text{F}_5)_3\cdot\text{SMe}_2]_i = N_{\text{B(C}_6\text{F}_5)_3\cdot\text{SMe}_2}/V = 8.28 \times 10^{-6} \text{ mol}/9.51 \times 10^{-3} \text{ L} = 0.00870 \text{ mol/L}$$

This concentration was then multiplied by the ratio converted to determine the concentrations of  $[\text{B(C}_6\text{F}_5)_3] = [\text{SMe}_2]$ . The remaining concentrations of  $[\text{B(C}_6\text{F}_5)_3\cdot\text{SMe}_2]_r$  were simply the subtraction of  $[\text{B(C}_6\text{F}_5)_3\cdot\text{SMe}_2]_i - [\text{B(C}_6\text{F}_5)_3]$  or  $[\text{B(C}_6\text{F}_5)_3\cdot\text{SMe}_2]_i - [\text{SMe}_2]$ , since  $\text{B(C}_6\text{F}_5)_3$  and  $\text{SMe}_2$  were present in a 1:1 ratio. The equilibrium constant  $K_{\text{eq}}$  was determined by:

$$K_{\text{eq}} = [\text{B(C}_6\text{F}_5)_3] \times [\text{SMe}_2] / [\text{B(C}_6\text{F}_5)_3\cdot\text{SMe}_2]$$

A Van't Hoff plot was then constructed by plotting the natural logarithm of  $K_{\text{eq}}$  against the inverse of the temperature (Figure S.4). The data used to construct the Van't Hoff plot are tabulated in Table S.2.

**Table S.2** Data used in Van't Hoff plot for  $\text{B}(\text{C}_6\text{F}_5)_3 \cdot \text{SMe}_2$ 

| T (K) | 1/T (K <sup>-1</sup> ) | $[\text{B}(\text{C}_6\text{F}_5)_3 \cdot \text{SMe}_2]$<br>(mol/L) | $[\text{B}(\text{C}_6\text{F}_5)_3] = [\text{SMe}_2]$<br>(mol/L) | $K_{\text{eq}} = \frac{[\text{B}(\text{C}_6\text{F}_5)_3][\text{SMe}_2]}{[\text{B}(\text{C}_6\text{F}_5)_3 \cdot \text{SMe}_2]}$ | $\ln(K_{\text{eq}})$ |
|-------|------------------------|--------------------------------------------------------------------|------------------------------------------------------------------|----------------------------------------------------------------------------------------------------------------------------------|----------------------|
| 308   | 0.00325                | 0.00804                                                            | 0.000661                                                         | $5.43 \times 10^{-5}$                                                                                                            | -9.82                |
| 318   | 0.00314                | 0.00740                                                            | 0.00130                                                          | $2.30 \times 10^{-4}$                                                                                                            | -8.38                |
| 328   | 0.00305                | 0.00667                                                            | 0.00203                                                          | $6.17 \times 10^{-4}$                                                                                                            | -7.39                |
| 338   | 0.00296                | 0.00601                                                            | 0.00269                                                          | $1.20 \times 10^{-3}$                                                                                                            | -6.72                |
| 348   | 0.00287                | 0.00532                                                            | 0.00338                                                          | $2.15 \times 10^{-3}$                                                                                                            | -6.14                |
| 358   | 0.00279                | 0.00448                                                            | 0.00422                                                          | $3.97 \times 10^{-3}$                                                                                                            | -5.53                |

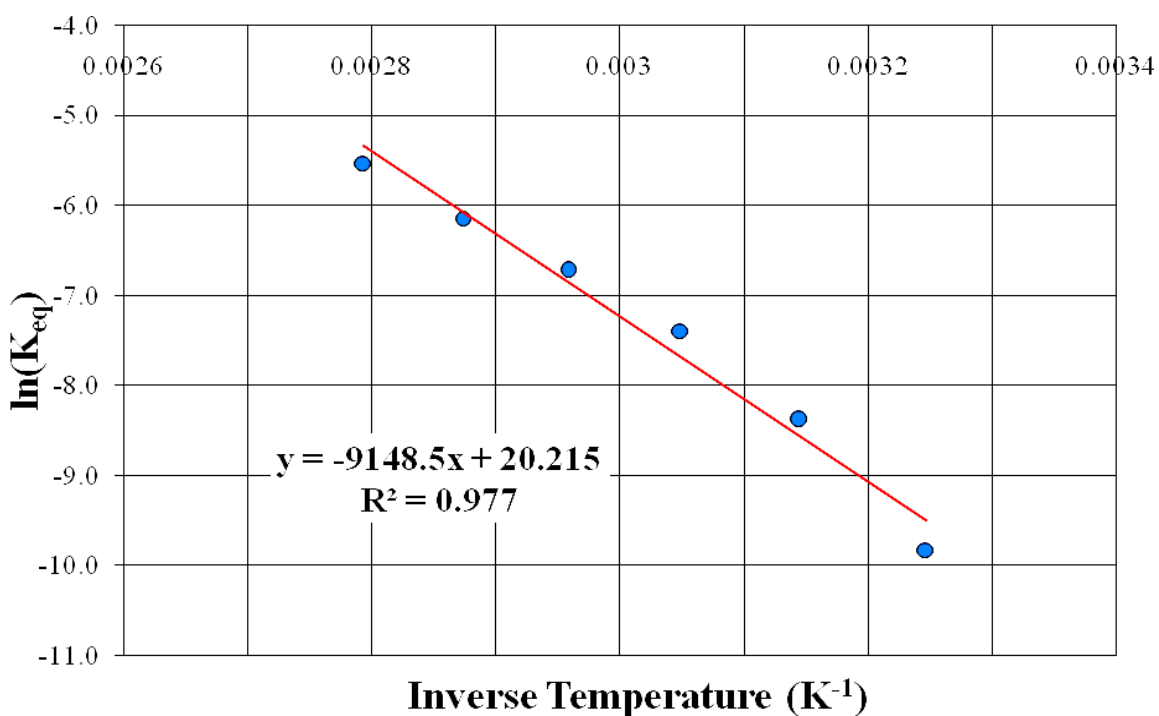**Figure S.4** Van't Hoff plot of  $\text{B}(\text{C}_6\text{F}_5)_3 \cdot \text{SMe}_2$ 

The change in enthalpy ( $\Delta H$ ), change in entropy ( $\Delta S$ ), and change in Gibbs free energy ( $\Delta G$ ) of the system can be expressed in the following two equations:

$$\Delta G = \Delta H - T\Delta S = -RT\ln(K_{eq})$$

$$\ln(K_{eq}) = -\Delta H/(RT) + \Delta S/R$$

$$\Delta H^\circ = -mR = -(-9148.5 \text{ K})(8.314 \text{ J/(mol}\cdot\text{K)}) = 76.1 \text{ kJ/mol}$$

$$\Delta S^\circ = bR = (20.215)(8.314 \text{ J/(mol}\cdot\text{K)}) = 168.1 \text{ J/(mol}\cdot\text{K)}$$

$$\Delta G^\circ = \Delta H^\circ - T\Delta S^\circ = (76.1 \text{ kJ/mol}) - (298.15 \text{ K})(168.1 \text{ J/(mol}\cdot\text{K)}) = 26.0 \text{ kJ/mol}$$

$$K_{eq} = e^{-\Delta G^\circ/RT} = e^{-(26.0 \text{ kJ/mol})/(8.314 \text{ J/(mol}\cdot\text{K)} \times 298.15 \text{ K})} = 2.8 \times 10^{-5}$$

(1) Heiden, Z. M.; Rauchfuss, T. B. *J. Am. Chem. Soc.* **2007**, *129*, 14303.
